# Supplementary material for: Insights into the binding of photothermal therapeutic agent bismuth sulfide nanorods with human serum albumin
Source: Royal Society of Chemistry journal article supplement (doi:10.1039/c5ra22641d), 2016-01-01
Supplement: c5ra22641d1.pdf [file c5ra22641d1.pdf]

## Insights into the binding of photothermal therapeutic agent bismuth sulfide nanorods with human serum albumin

Received 00th January 20xx,  
Accepted 00th January 20xx

Selvaraj Naveenraj<sup>a,b</sup>, Ramalinga Viswanathan Mangalaraja<sup>a\*</sup>, Jerry J. Wu<sup>c</sup>, Abdullah M. Asiri<sup>d</sup>, Sambandam Anandan<sup>b\*\*</sup>

DOI: 10.1039/x0xx00000x

www.rsc.org/

### Supporting Information

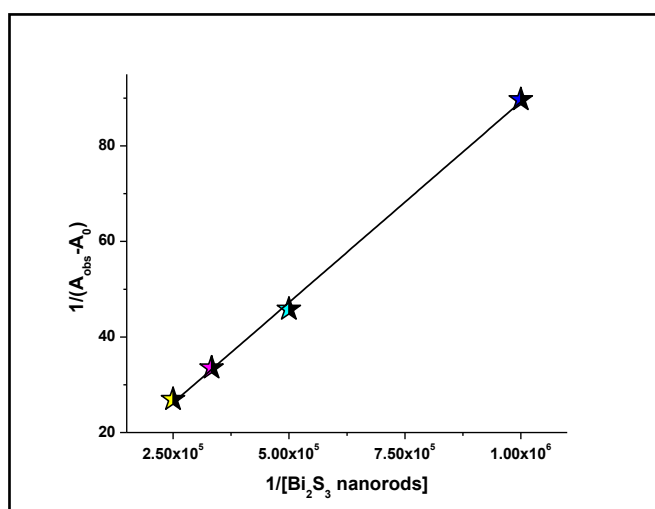

Fig. S1 Benzi- Hildebrand Plot for the association of HSA with  $\text{Bi}_2\text{S}_3$  nanorods

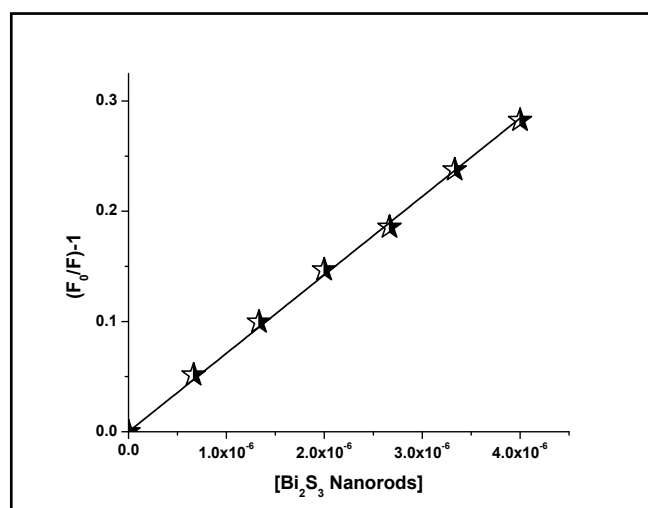

Fig. S2 Stern-Volmer plot for serum albumins vs  $\text{Bi}_2\text{S}_3$  nanorods.

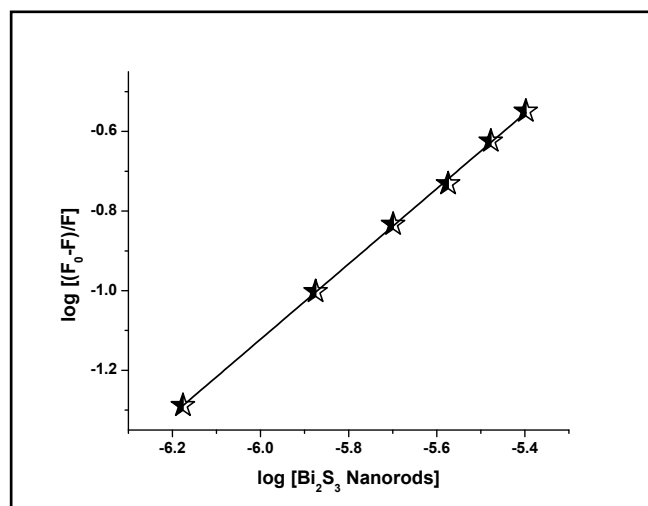

Fig. S3  $\log [(F_0-F)/F]$  vs  $\log [Q]$  plot (b) for serum albumins vs  $\text{Bi}_2\text{S}_3$  nanorods.

<sup>a</sup> Advanced Ceramics and Nanotechnology Laboratory, Department of Materials Engineering, University of Concepcion, Concepcion, Chile.

<sup>b</sup> Nanomaterials & Solar Energy Conversion Lab, Department of Chemistry, National Institute of Technology, Tiruchirappalli 620015, India.

<sup>c</sup> Department of Environmental Engineering and Science, Feng Chia University, Taichung 407, Taiwan.

<sup>d</sup> The Center of Excellence for Advanced Materials Research, King Abdul Aziz University, Jeddah 21413, P.O. Box 80203, Saudi Arabia.

† Corresponding Authors

\* (R.V.M) E-mail: [mangal@udec.cl](mailto:mangal@udec.cl); Tel.: +56 41 2207389; fax: +56 41 2203391.

\*\* (S.A) E-mail: [sanand@nitt.edu](mailto:sanand@nitt.edu), [sanand99@yahoo.com](mailto:sanand99@yahoo.com); Tel.: +91 431 2503639;

fax: +91 431 2500133.

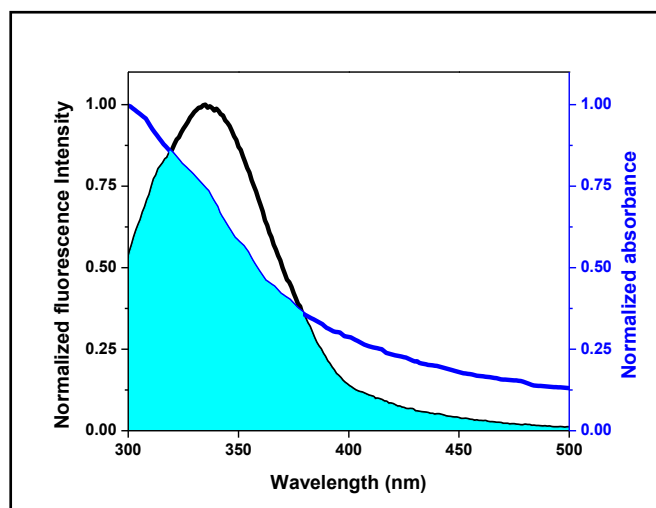

**Fig. S4** Normalized overlap plot of fluorescence spectrum of serum albumins HSA with absorption spectrum of Bi<sub>2</sub>S<sub>3</sub> nanorods.
